# Supplementary material
Source: bioRxiv or medRxiv preprint supplement (https://www.biorxiv.org/content/biorxiv/early/2020/07/31/2020.07.31.224600/DC1/embed/media-1.pdf)

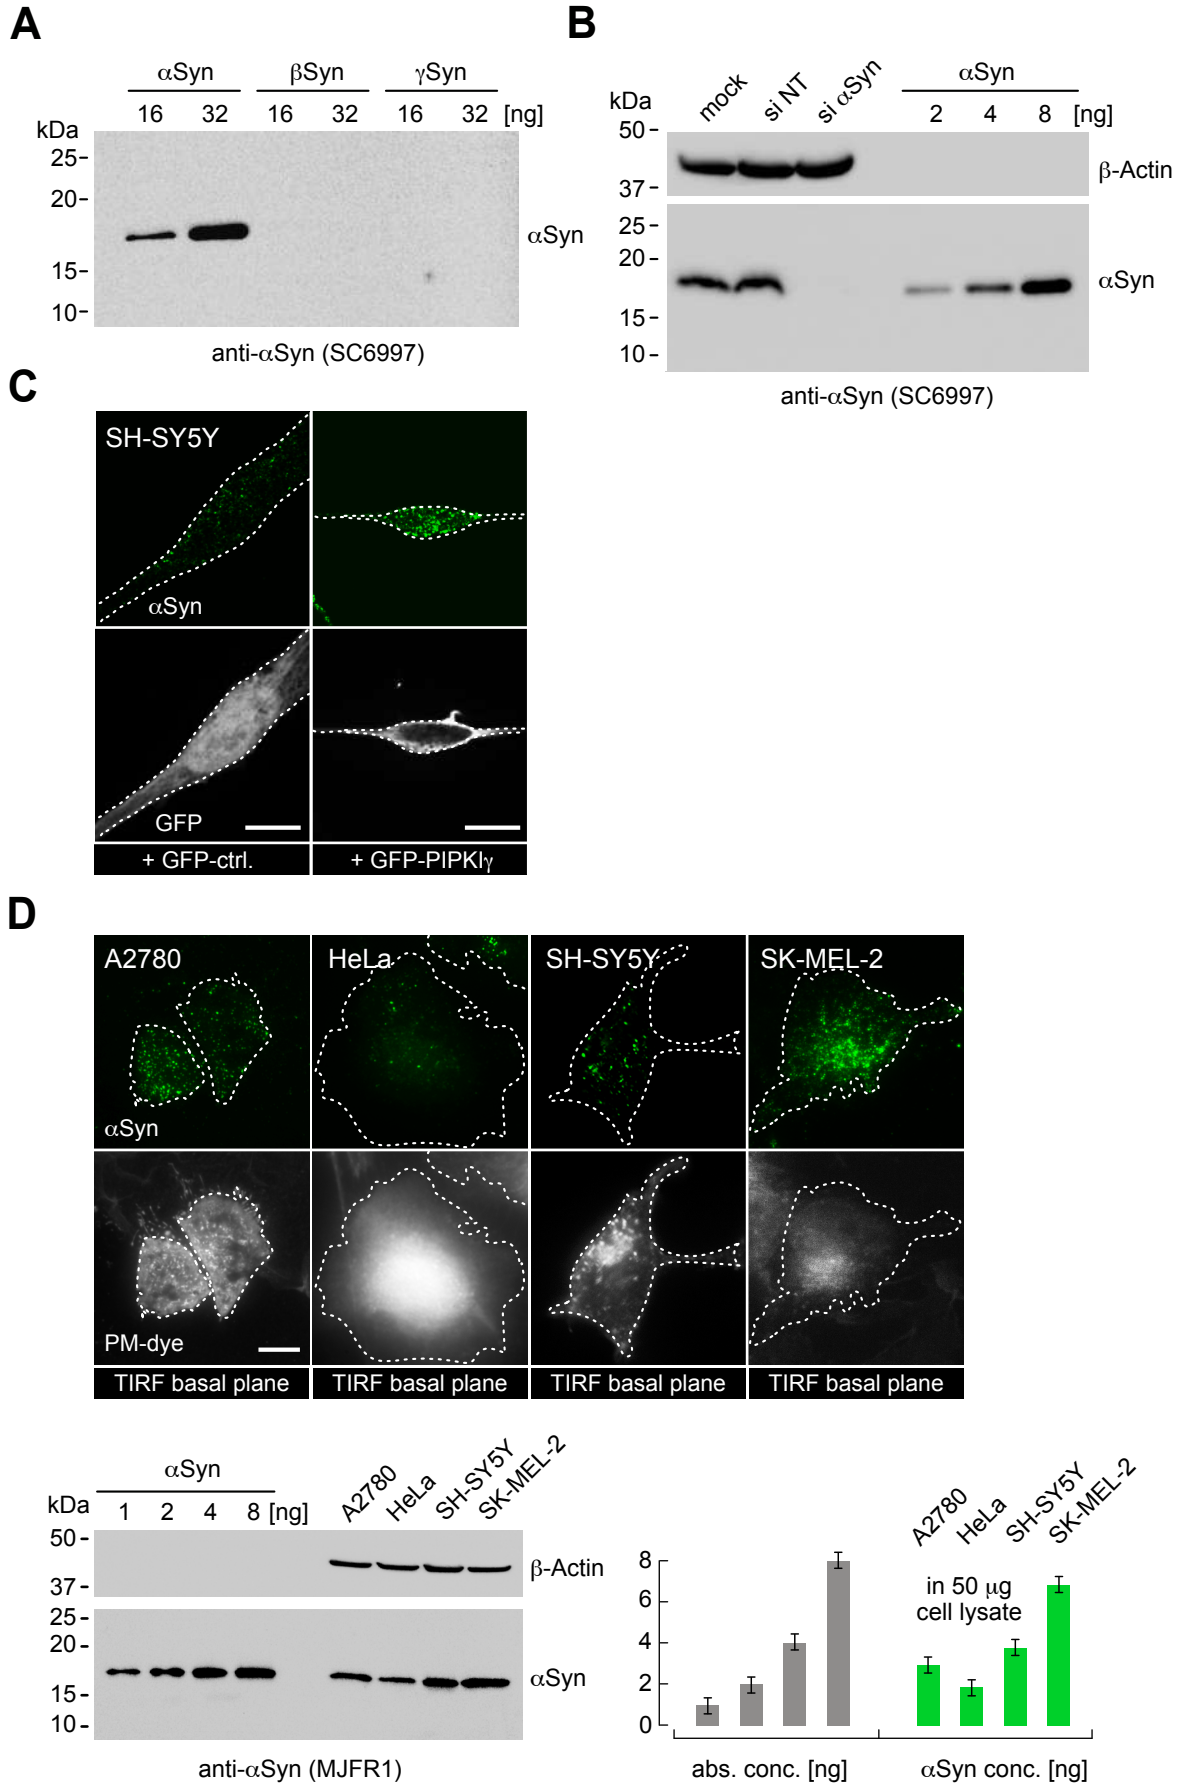

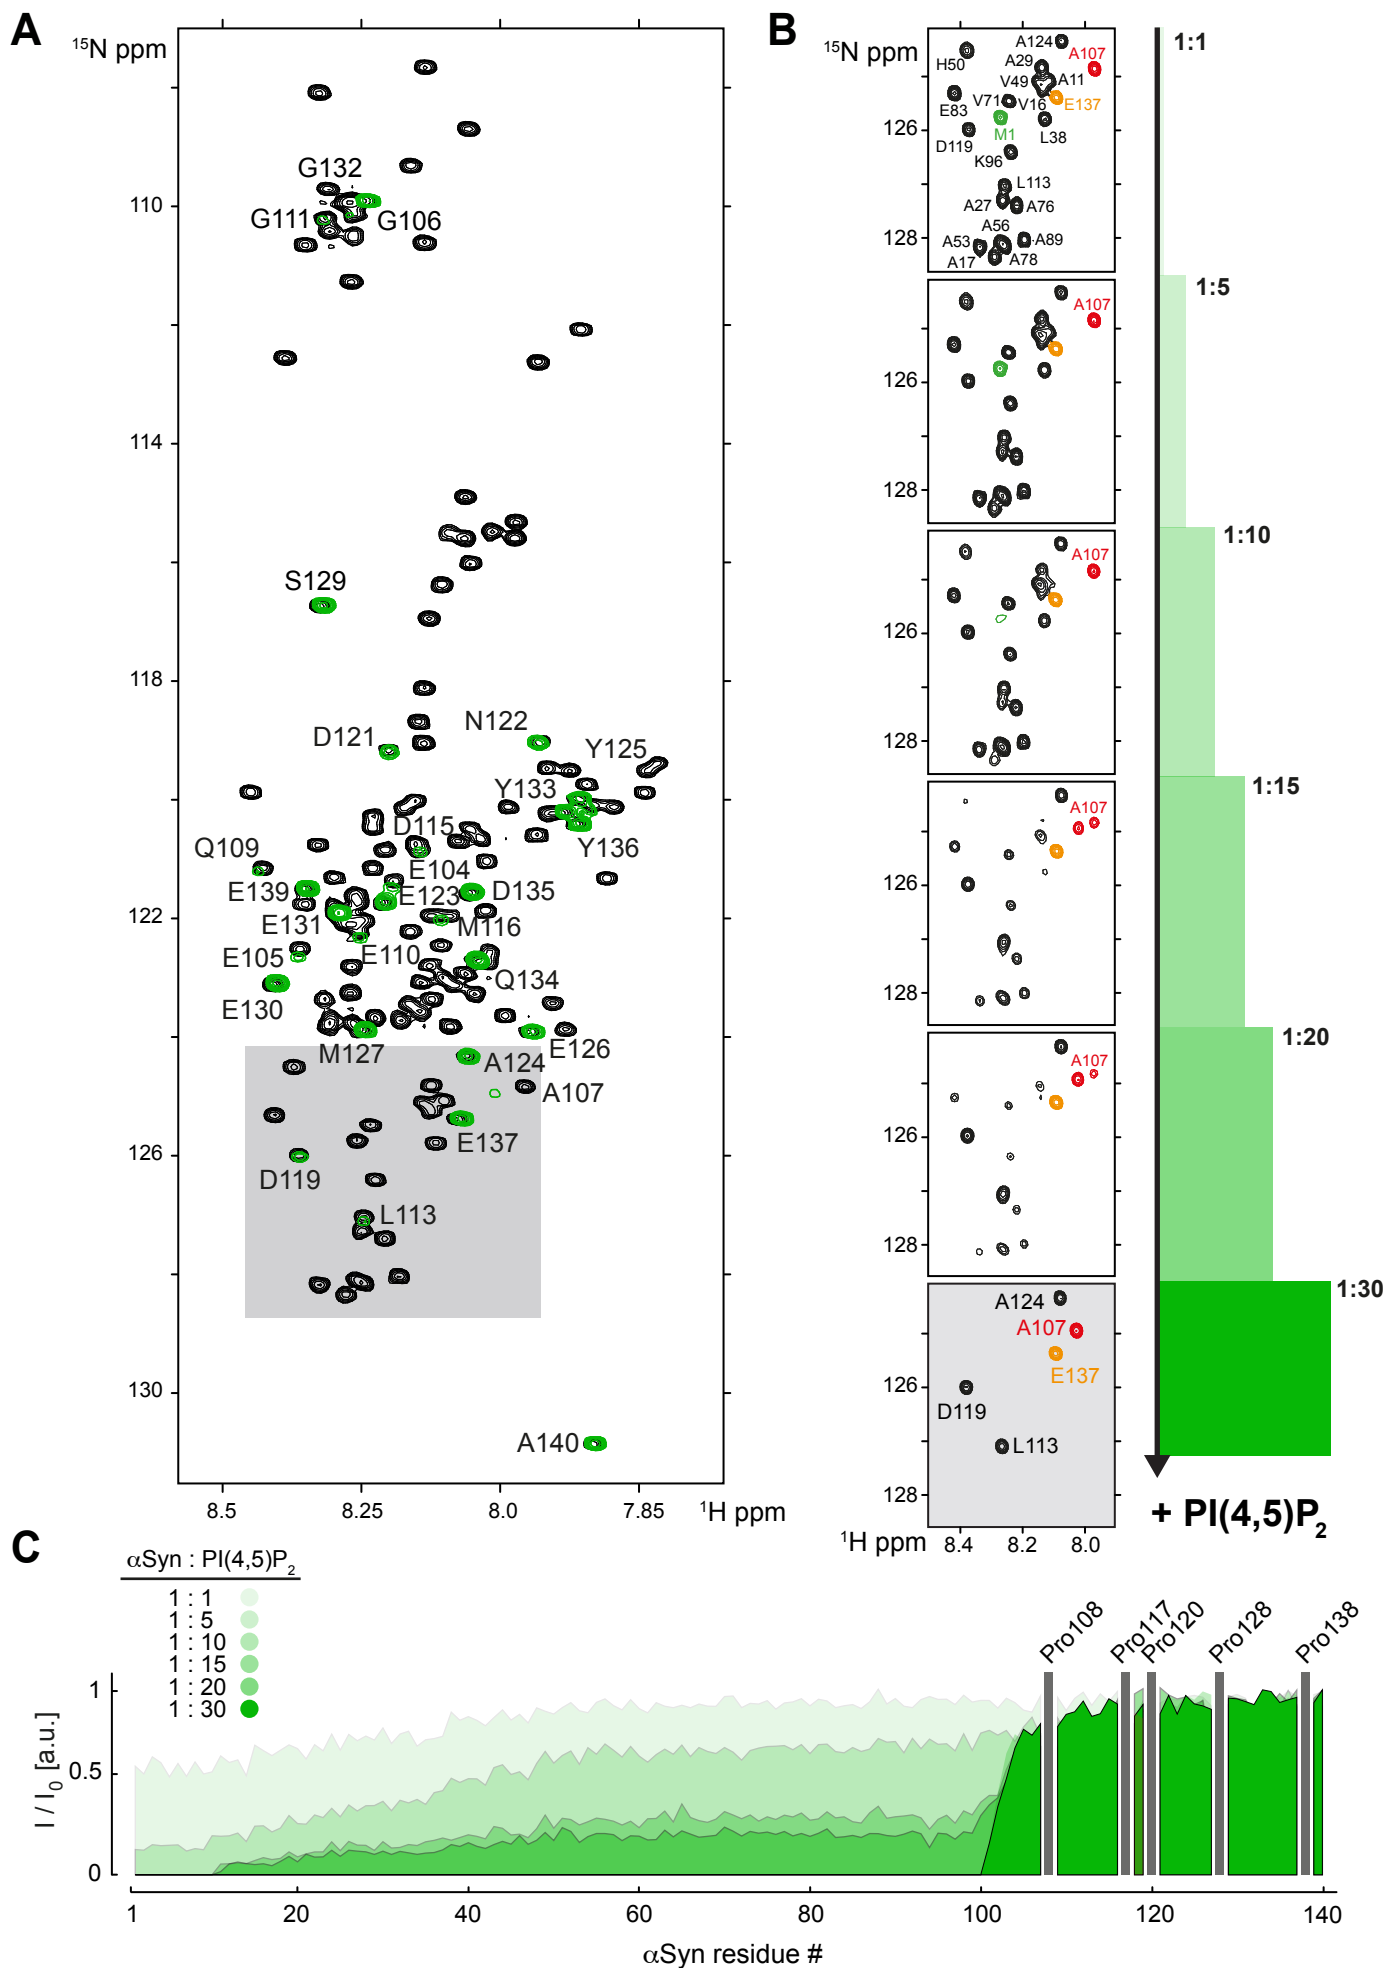

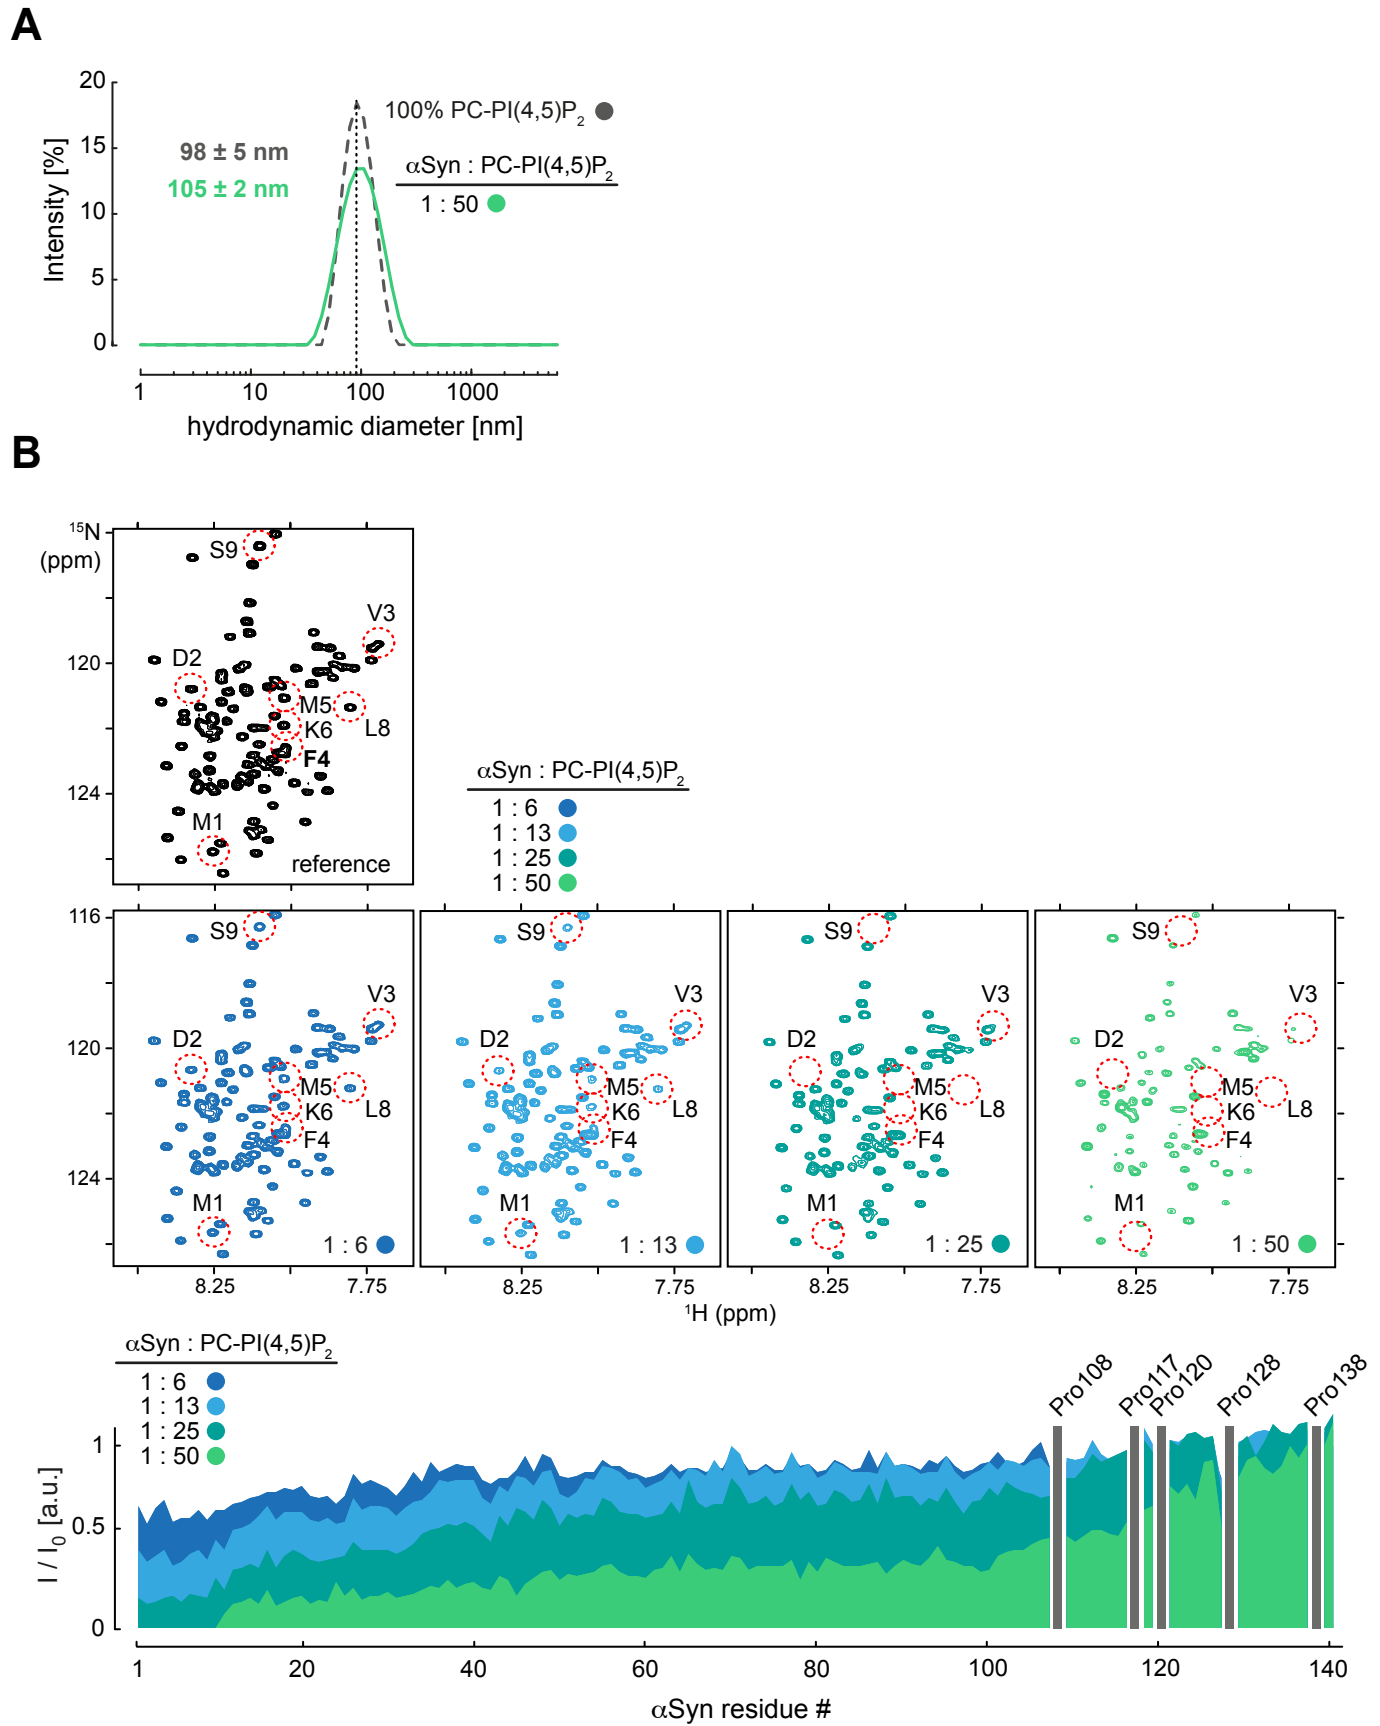

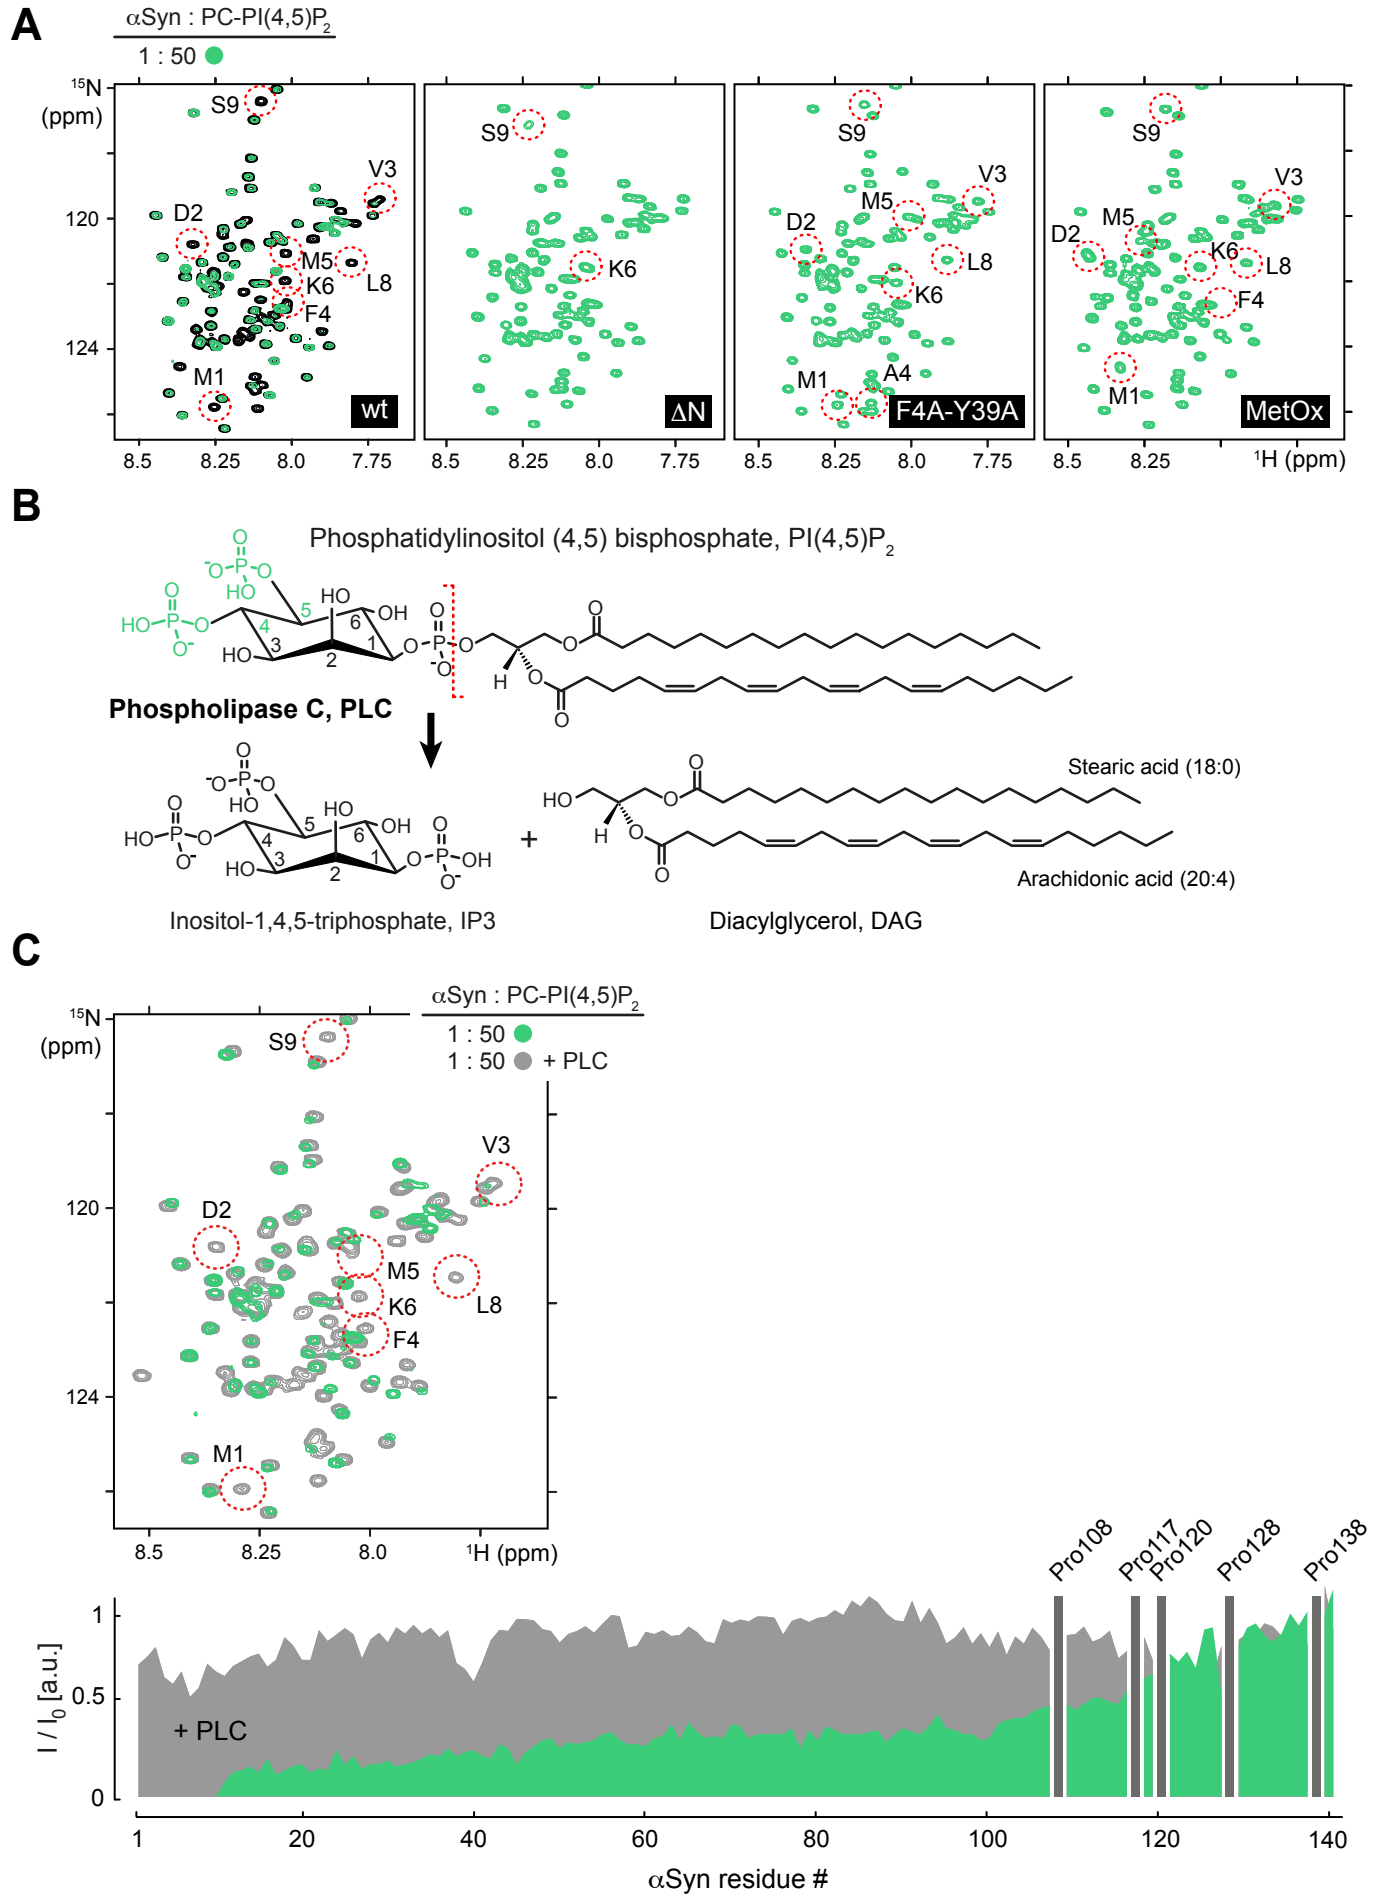

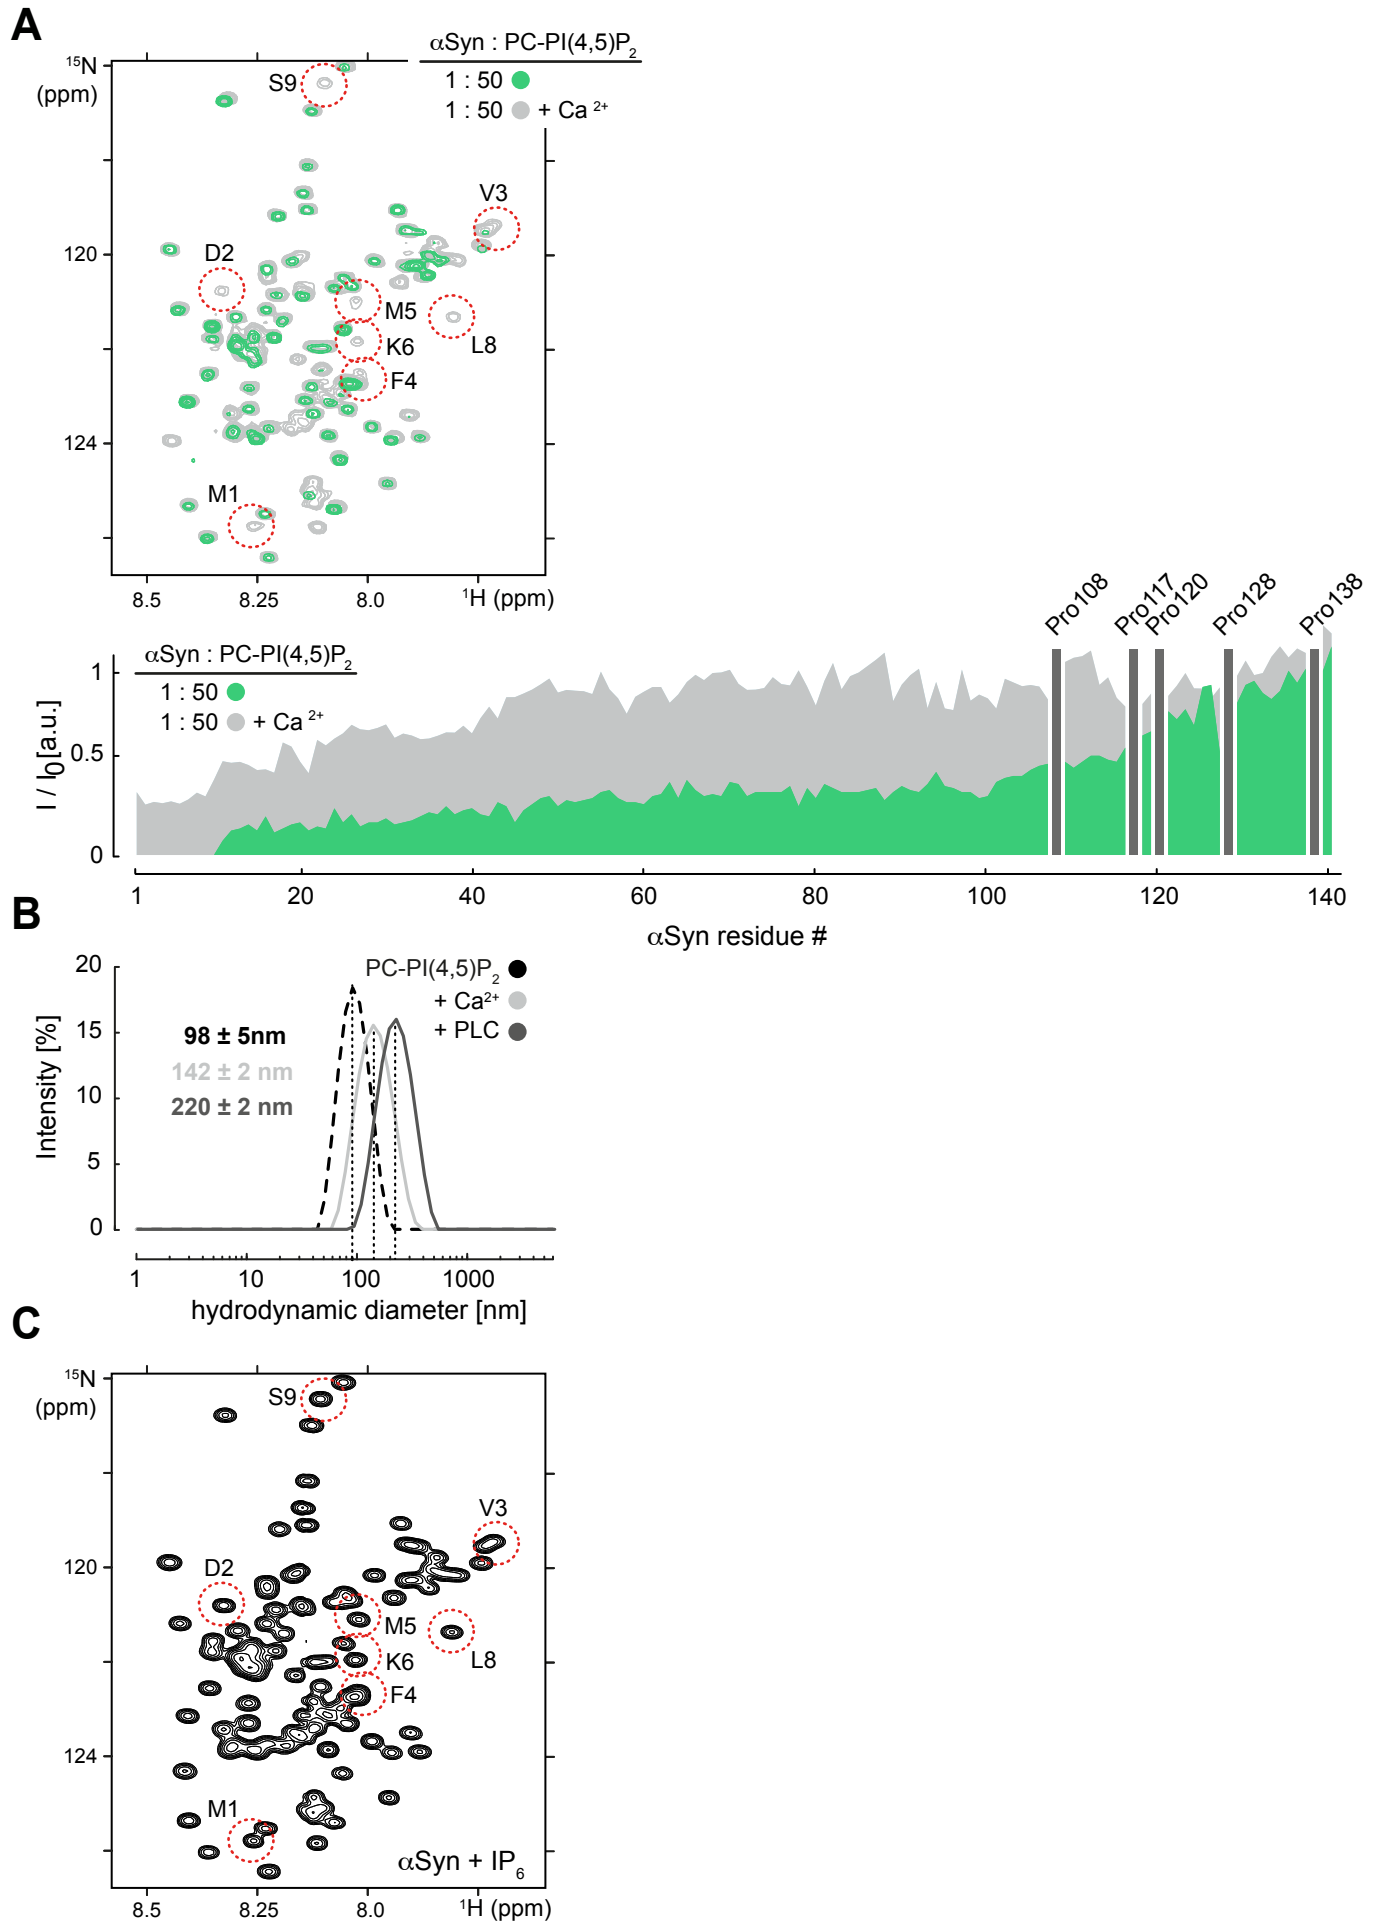

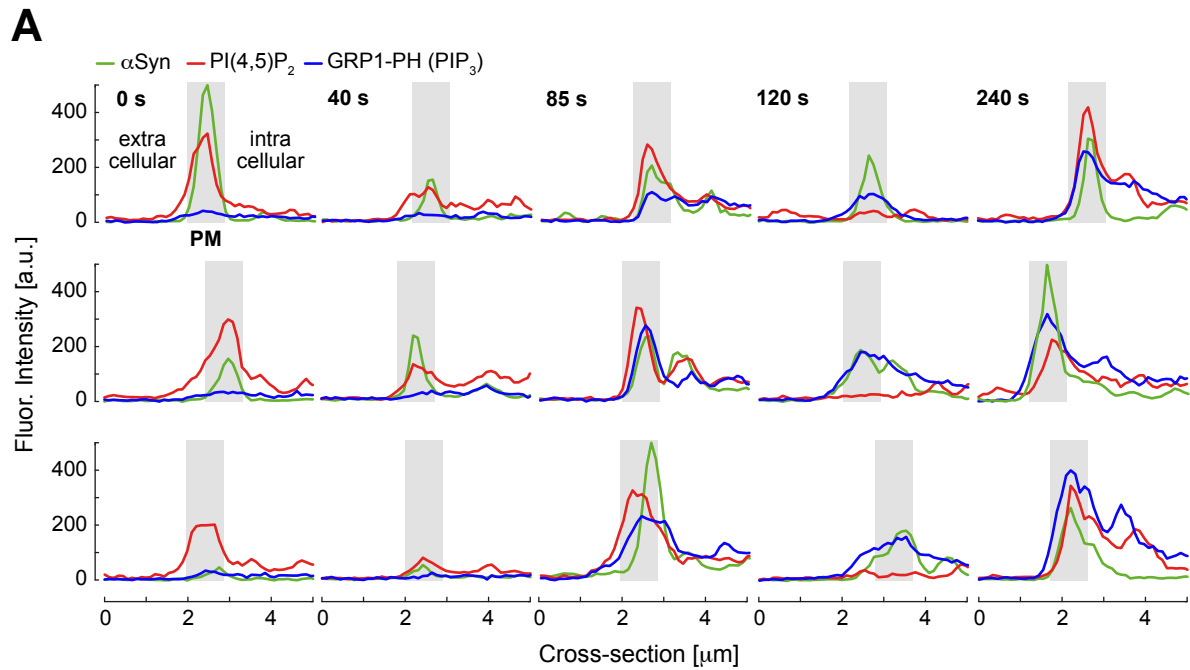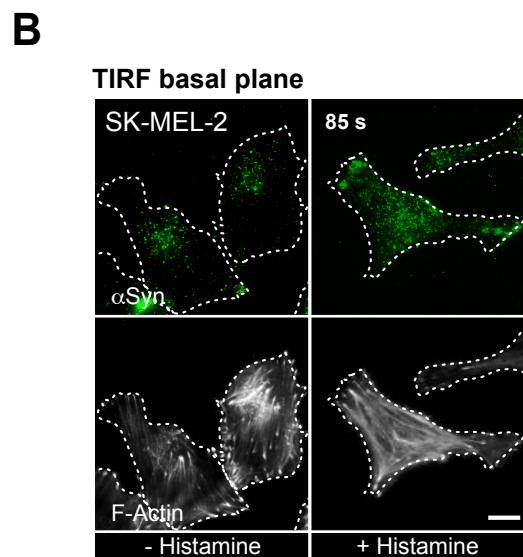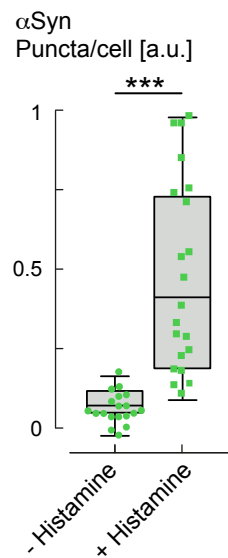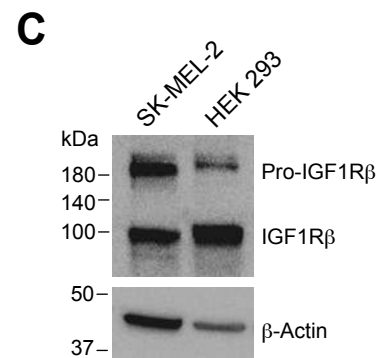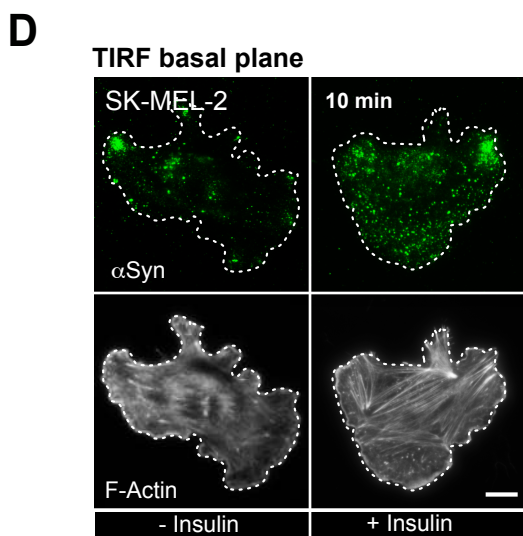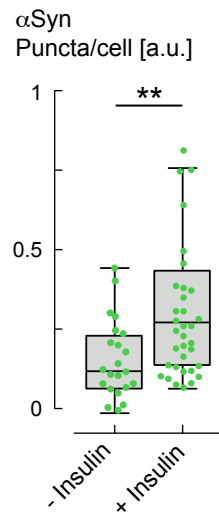

Supplement: Supplementary file [file media-1.pdf]
